# Supplementary material for: Identification of potential serum peptide biomarkers of biliary tract cancer using MALDI MS profiling
Source: PubMed Central journal article supplement (PMC3923428; doi:10.1186/1472-6890-14-7), 2014-02-04
Supplement: 1472-6890-14-7-S2.pdf [file 1472-6890-14-7-S2.pdf]

| Group | Patients | Gender | Median age (yrs) | Age range (yrs) | Median bilirubin (mg/mL) | Median CA 19.9 (IU/mL) | CA 19.9 >37 IU/mL | BTC stage $\geq$ T3 |
|-------|----------|--------|------------------|-----------------|--------------------------|------------------------|-------------------|---------------------|
| BTC   | 14       | 7F:7M  | 73               | 44-90           | 19                       | 404                    | 11/14             | 8/14                |
| H     | 16       | 8F:8M  | 34               | 23-80           | ND                       | ND                     | N/A               | N/A                 |

**Table S1** Clinical characteristics of external validation set



| Mass (m/z) | Average peak area BTC +/- SD | Average peak area benign +/- SD | Fold-change (BTC vs benign) | Wilcoxon test P value | AUROC <sup>†</sup> |
|------------|------------------------------|---------------------------------|-----------------------------|-----------------------|--------------------|
| 887.2      | 5.23 +/- 7.12                | 2.93 +/- 4.69                   | 1.78                        | 0.0243                | 0.74               |
| 2082.1     | 8.97 +/- 3.27                | 17.12 +/- 15.53                 | 0.52                        | 0.0243                | 0.74               |
| 2210.3     | 11.21 +/- 3.9                | 22.92 +/- 19.34                 | 0.49                        | 0.0243                | 0.75               |
| 2554.5     | 24.45 +/- 17.66              | 43.06 +/- 27.41                 | 0.57                        | 0.0243                | 0.74               |
| 2903.3     | 15.44 +/- 8.17               | 10.06 +/- 5.17                  | 1.53                        | 0.011                 | 0.78               |
| 2932.8     | 79.15 +/- 59.89              | 138.59 +/- 95.83                | 0.57                        | 0.0243                | 0.73               |
| 5805.0     | 39.57 +/- 35.44              | 21.27 +/- 20.37                 | 1.86                        | 0.0357                | 0.73               |

**Table S3** Significant peptide peaks differentiating BTC from benign cases.

<sup>†</sup>Area under the Receiver Operating Characteristic curve.

| Model         | Training/test set permutation | Sensitivity (%) | Specificity (%) | Accuracy (%) | PPV (%) | NPV (%) | Cross-validation (20% leave out) (%) |
|---------------|-------------------------------|-----------------|-----------------|--------------|---------|---------|--------------------------------------|
| SVM_9pk_3knn  | 5                             | 100.00          | 100.00          | 100.00       | 100.00  | 100.00  | 94.40%                               |
| SVM_5pk_1knn  | 5                             | 100.00          | 100.00          | 100.00       | 100.00  | 100.00  | 93.50%                               |
| SVM_7pk_1knn  | 5                             | 100.00          | 100.00          | 100.00       | 100.00  | 100.00  | 92.90%                               |
| SVM_9pk_1knn  | 5                             | 100.00          | 100.00          | 100.00       | 100.00  | 100.00  | 92.90%                               |
| GA_7pk_1knn   | 1                             | 100.00          | 100.00          | 100.00       | 100.00  | 100.00  | 92.60%                               |
| SVM_8pk_1knn  | 5                             | 100.00          | 100.00          | 100.00       | 100.00  | 100.00  | 91.40%                               |
| SVM_6pk_1knn  | 5                             | 100.00          | 100.00          | 100.00       | 100.00  | 100.00  | 91.10%                               |
| SVM_8pk_1knn  | 2                             | 100.00          | 100.00          | 100.00       | 100.00  | 100.00  | 90.80%                               |
| SVM_8pk_3knn  | 2                             | 100.00          | 100.00          | 100.00       | 100.00  | 100.00  | 90.50%                               |
| SVM_9pk_3knn  | 2                             | 100.00          | 100.00          | 100.00       | 100.00  | 100.00  | 90.50%                               |
| SVM_auto_3knn | 2                             | 100.00          | 100.00          | 100.00       | 100.00  | 100.00  | 90.50%                               |
| SVM_auto_5knn | 3                             | 100.00          | 100.00          | 100.00       | 100.00  | 100.00  | 90.50%                               |
| SVM_3pk_1knn  | 5                             | 100.00          | 100.00          | 100.00       | 100.00  | 100.00  | 89.90%                               |
| SVM_7pk_3knn  | 5                             | 100.00          | 100.00          | 100.00       | 100.00  | 100.00  | 89.10%                               |
| SVM_auto_3knn | 5                             | 100.00          | 100.00          | 100.00       | 100.00  | 100.00  | 89.10%                               |
| GA_5pk_1knn   | 5                             | 100.00          | 100.00          | 100.00       | 100.00  | 100.00  | 88.40%                               |
| GA_7pk_7knn   | 3                             | 100.00          | 100.00          | 100.00       | 100.00  | 100.00  | 88.20%                               |
| GA_6pk_1knn   | 1                             | 100.00          | 100.00          | 100.00       | 100.00  | 100.00  | 87.90%                               |
| GA_4pk_1knn   | 5                             | 100.00          | 100.00          | 100.00       | 100.00  | 100.00  | 87.90%                               |
| GA_9pk_1knn   | 1                             | 100.00          | 100.00          | 100.00       | 100.00  | 100.00  | 87.60%                               |
| SVM_9pk_1knn  | 2                             | 100.00          | 100.00          | 100.00       | 100.00  | 100.00  | 87.60%                               |
| GA_4pk_1knn   | 2                             | 100.00          | 100.00          | 100.00       | 100.00  | 100.00  | 85.80%                               |
| SVM_2pk_1knn  | 5                             | 100.00          | 100.00          | 100.00       | 100.00  | 100.00  | 83.50%                               |
| GA_8pk_3knn   | 2                             | 100.00          | 100.00          | 100.00       | 100.00  | 100.00  | 79.40%                               |
| SNN           | 5                             | 100.00          | 100.00          | 100.00       | 100.00  | 100.00  | 73.80%                               |

**Table S4** Best-performing predictive models for determining BTC versus healthy. A SVM 9 peak model was the best performing on cross-validation and for test set classification (shaded grey).

| Ave Mass by MALDI-TOF (m/z) | Calculated average mass (Da) | Calculated average mass [M+H] <sup>+</sup> | Calculated monoisotopic mass (Da) | Name             | Sequence                                                  | Identification                    |
|-----------------------------|------------------------------|--------------------------------------------|-----------------------------------|------------------|-----------------------------------------------------------|-----------------------------------|
| 887.2                       |                              |                                            |                                   |                  |                                                           | no                                |
| 1020.2                      | 1020.11                      | 1021.12                                    | 1019.50                           | Fibrinopeptide A | DFLAEGGGVR                                                | yes; Villanueva et al; Tiss et al |
| 1263.7                      | 1263.33                      | 1264.34                                    | 1262.59                           | Fibrinopeptide A | GEGDFLAEGGGVR                                             | yes; Villanueva et al; Tiss et al |
| 1350.8                      | 1350.41                      | 1351.42                                    | 1349.62                           | Fibrinopeptide A | SGEGDFLAEGGGVR                                            | yes; Villanueva et al; Tiss et al |
| 1363.4                      |                              |                                            |                                   |                  |                                                           | no                                |
| 2082.1                      | 2086.07                      | 2087.08                                    | 2084.89                           | Fibrinogen alpha | GGSTSYGTGSETESPRNPSSAG                                    | Koomen et al                      |
| 2210.3                      | 2209.33                      | 2210.34                                    | 2208.05                           | HMW kininogen    | KHNLGHGHKHERDQGHGHQ                                       | Villanueva et al; Tiss et al      |
| 2554.5                      | 2553.59                      | 2554.60                                    | 2552.09                           | Fibrinogen alpha | SSSYSKQFTSSTSYNRGDSTFES                                   | Villanueva et al; Tiss et al      |
| 2624.6                      | 2624.93                      | 2625.94                                    | 2623.40                           | Fibrinogen alpha | LVTSKGDKELRTGKEKVTSGSTTTT                                 | Koomen et al                      |
| 2903.3                      |                              |                                            |                                   |                  |                                                           | no                                |
| 2932.8                      | 2932.02                      | 2933.03                                    | 2930.28                           | Fibrinogen alpha | SSSYSKQFTSSTSYNRGDSTFESKSY                                | Villanueva et al; Tiss et al      |
| 5064.8                      |                              |                                            |                                   |                  |                                                           | no                                |
| 5805.0                      | 5805.09                      | 5806.10                                    | 5801.63                           | Fibrinogen alpha | SSSYSKQFTSSTSYNRGDSTFESKSYK<br>MADEAGSEADHEGTHSTKRGHAKSRP | yes                               |

**Table S5** List of identified and predicted peak identifications. C18-extracted and gel separated serum samples were subjected to high-mass accuracy LC-MS/MS as described in Materials and Methods. Predicted identifications were made from published lists of MALDI-TOF and LC-MS/MS peak identifications, including our own previous work (Ref 17; Tiss et al.).

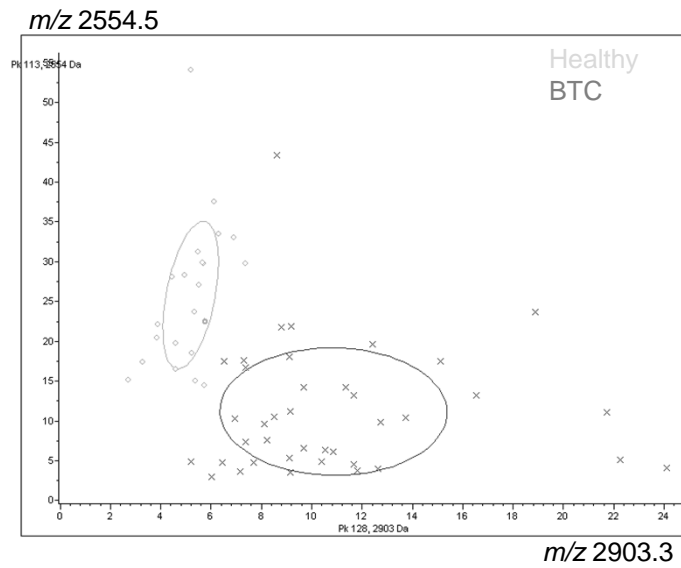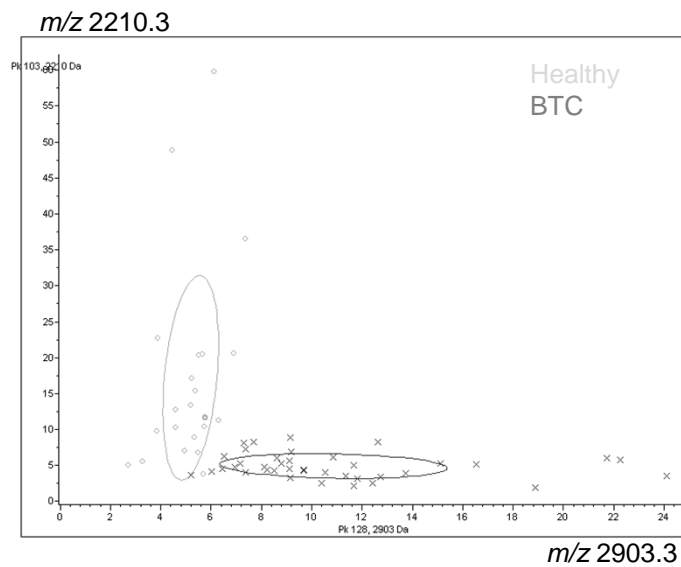

**Figure S1** 2D scatter plots of peak intensities for **A.** *m/z* 2554.5 vs *m/z* 2903.3 and **B.** *m/z* 2210.3 vs *m/z* 2903.3 showing separation of BTC and healthy samples.

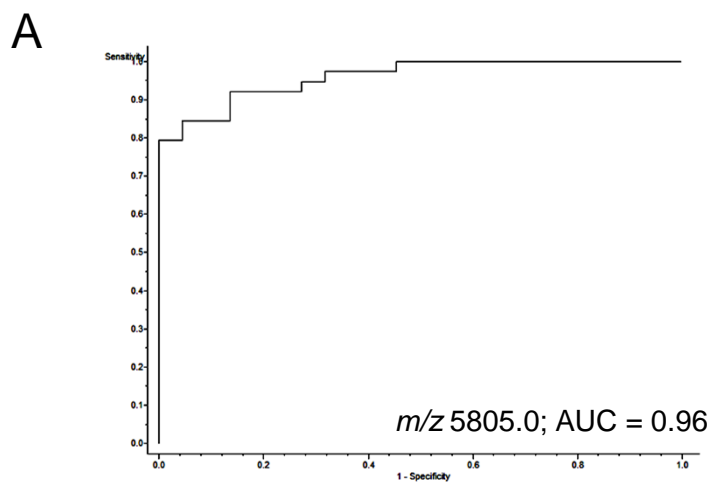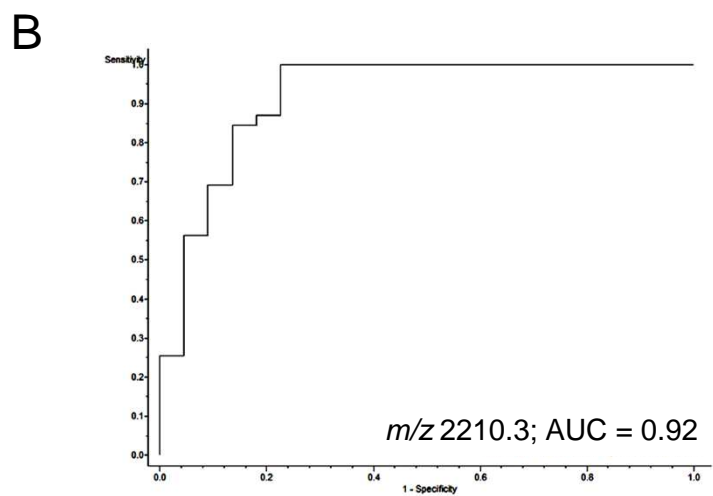

**Figure S2** Receiver Operating Characteristics (ROC) curve analysis. **A.** The peak at  $m/z$  5805.0 gave an area under the curve (AUC) of 0.96 for BTC versus healthy samples. **B.** The peak at  $m/z$  2210.3 gave an AUC of 0.92 for BTC versus healthy samples.

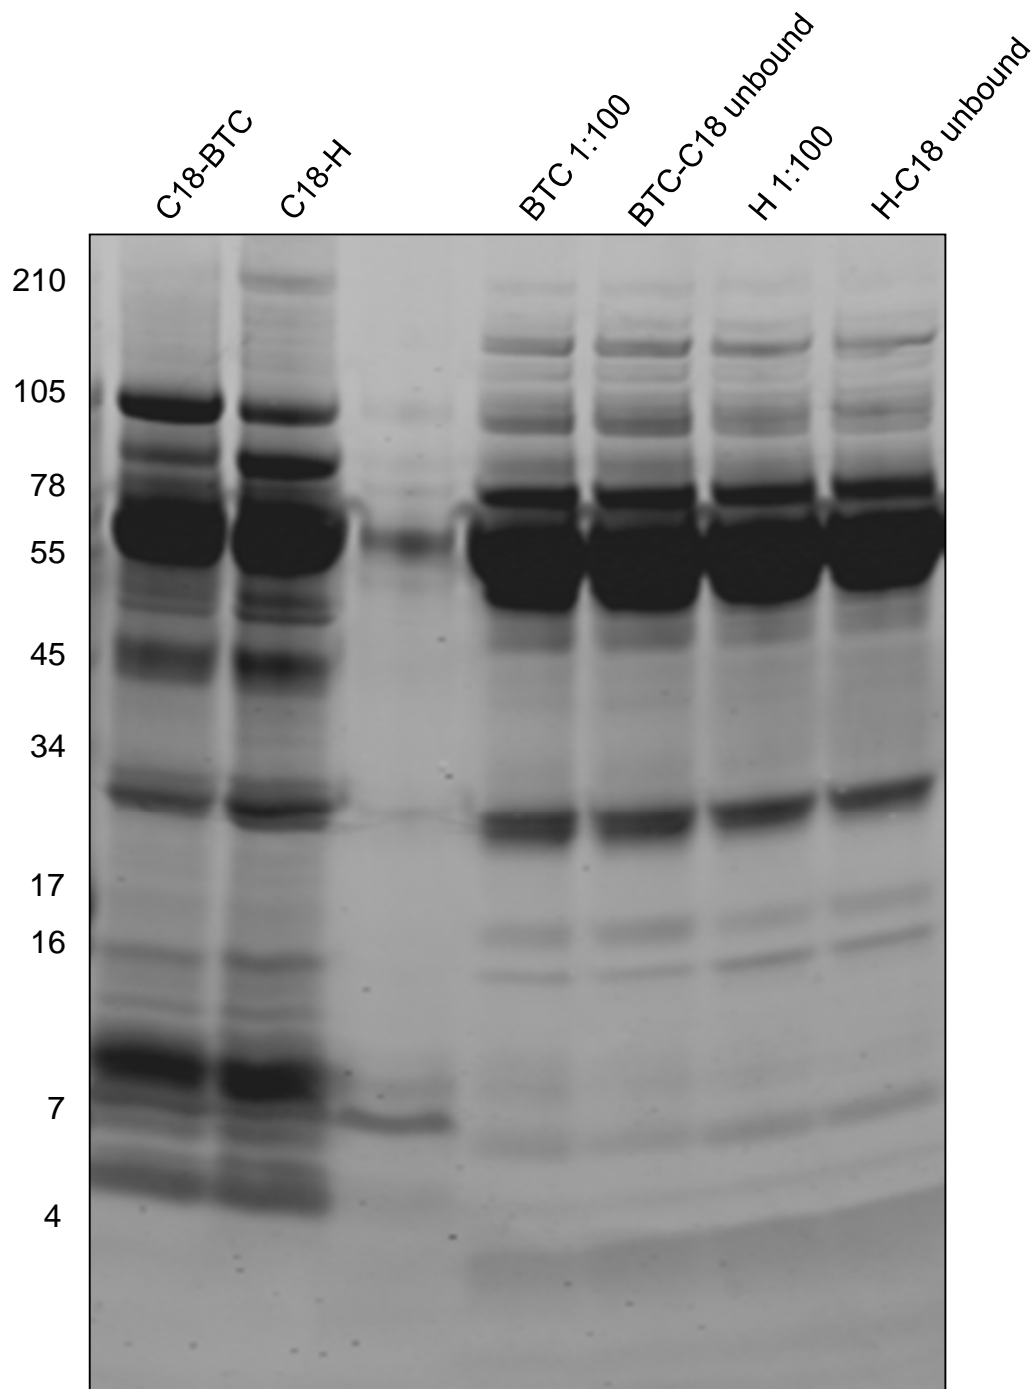

**Figure S3** 1D-Tris-tricine (10-20%) gel of C18 bead-extracted sera, unbound material and crude sera. Protein loads (~15 µg) were C18-extracted BTC sample pool (C18-BTC), C18-extracted healthy sample pool (C18-H), crude BTC serum (BTC 1:100), crude healthy serum (H 1:100;), unbound BTC material (BTC-C18 unbound) and unbound healthy material (H-C18 unbound). Bands below 20 kDa were cut from the gel, proteins/peptides passively eluted and analysed by LC-MS/MS.
